# Supplementary material for: Differential Expression of Hepatic Genes of the Greater Horseshoe Bat (Rhinolophus ferrumequinum) between the Summer Active and Winter Torpid States
Source: PLoS One. 2015 Dec 23;10(12):e0145702. doi: 10.1371/journal.pone.0145702 (PMC4689453; doi:10.1371/journal.pone.0145702)
Supplement: S1 Table — (DOCX) [file pone.0145702.s001.docx]

| **Gene** | **Primer** | **Base sequence (5’- 3’)** | **Products (bp)** |
| --- | --- | --- | --- |
| *SDR42E1* | Sense | CTTCCTCTTGGTTATGGCAGTT | 319 |
| Anti-sense | AAGAAAGAGGGCACACAAGAAG |
| *CCND2* a | Sense | GAGATCCCCAAGAACTCT | 228 |
| Anti-sense | AGTCAGTCTCGTAGGGTG |
| *TXK* | Sense | CTGCCTGGTCACAGAGAAGAAC | 164 |
| Anti-sense | CATCGCTCTCGGACGAATAG |
| *ALAS2* | Sense | TGGGATTGGGGAGCGTGAT | 168 |
| Anti-sense | ATGGGAGGCAGTGAAGTGGTG |
| *NUP37* | Sense | AAACACCTTGAAAGTCGGAG | 166 |
| Anti-sense | GCCAGGATAACCAGTAGTAGC |
| *DYRK1A* b | Sense | TTATGACACACGCAAAGTGA | 192 |
| Anti-sense | GGCCTTATGGATTTGGA |
| *UFSP2* | Sense | CAGTGCTCAGACAGAAACGAAGT | 159 |
| Anti-sense | TGTTGAGCCAAAAGCCATAGC |
| *ZBED1* | Sense | TGACGTAGGTCCTGTTCTGGTT | 238 |
| Anti-sense | CTCATCTGCGATGGGCTGT |
| *TAT* | Sense | AACATCGGTGGGAAAAACT | 215 |
| Anti-sense | GTAACTTCTGGGTCTGTAGGC |
| *UCP2* | Sense | GCTGCTCATAGGTGACGAACAT | 196 |
| Anti-sense | ACCATCATTGCCTCCCCTGT |
| *FGA* | Sense | CATACCTGATTTAGACTCGTTCC | 170 |
| Anti-sense | CAGATGCTGAGCCCATAGAC |
| *ARG1* | Sense | TCCAAGCCCAAATCCATAGG | 153 |
| Anti-sense | CAGGTCCCCATAATCTTTTACATC |
| *CPB2* | Sense | AGCAGACTTCCAACGACGC | 271 |
| Anti-sense | AACCACAAGCAGAAAGCAGG |
| *β-actin* a | Sense | GACCTCTATGCCAACACAG | 190 |
| Anti-sense | CATCTGCTGGAAGGTGGAC |

aPrimer pairs of *CCND2* and *β-actin* was obtained in Chen et al. 2008. bPrimers obtained in Chen et al. 2007.
